# Supplementary material
Source: PubMed Central journal article supplement (PMC5500762)
Supplement: 10.1074_M117.067835_mcp.M117.067835-1.pdf [file 10.1074_M117.067835_mcp.M117.067835-1.pdf]

## Supplementary Figures and Legends

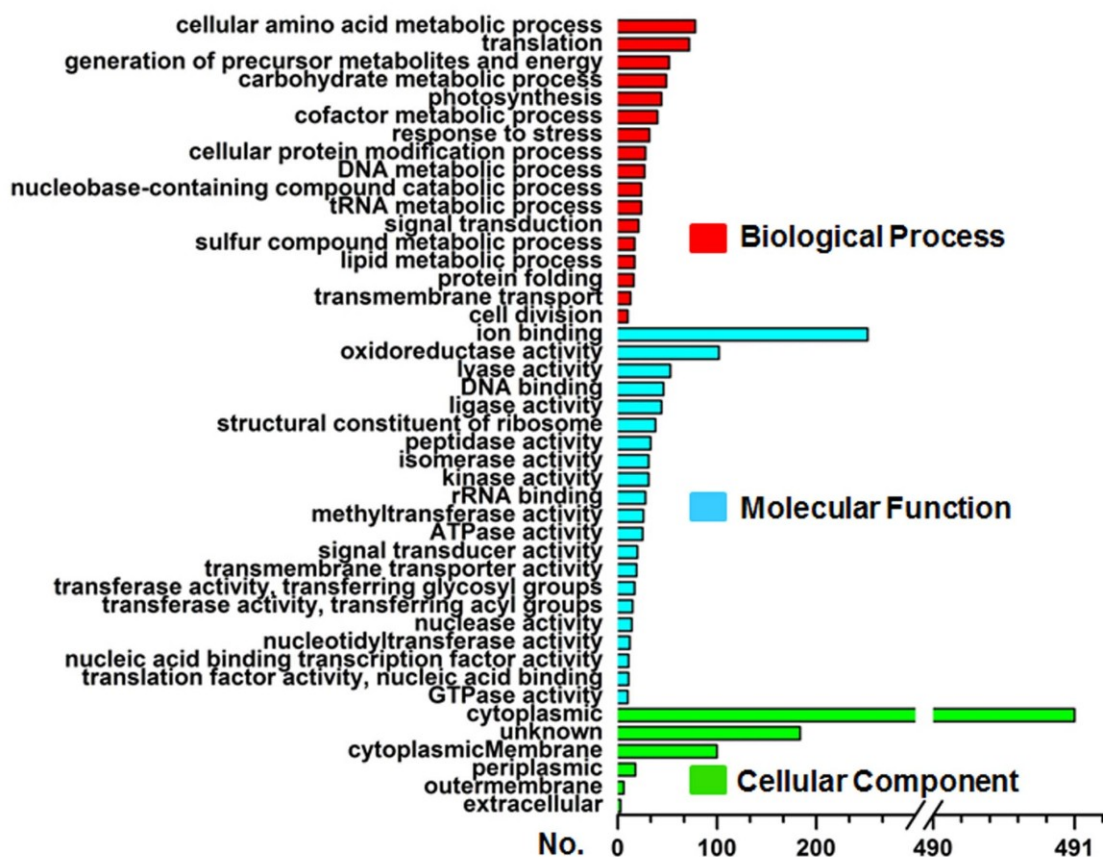

Figure S1. Functional classification of the identified acetylated proteins.

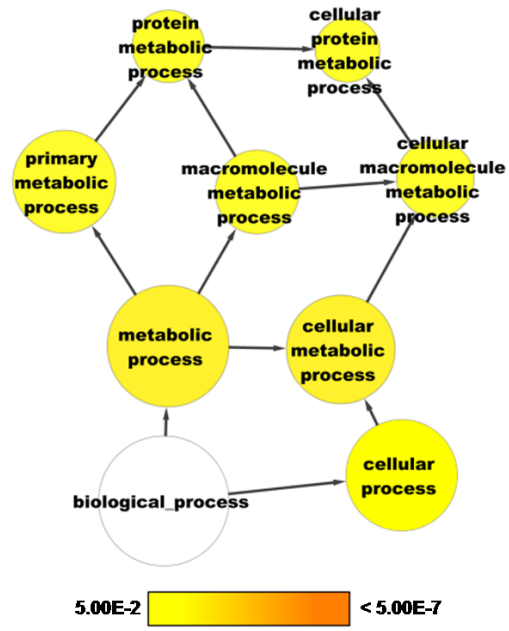

**Figure S2. GO enrichment analysis for the biological process of the identified acetylated proteins.**



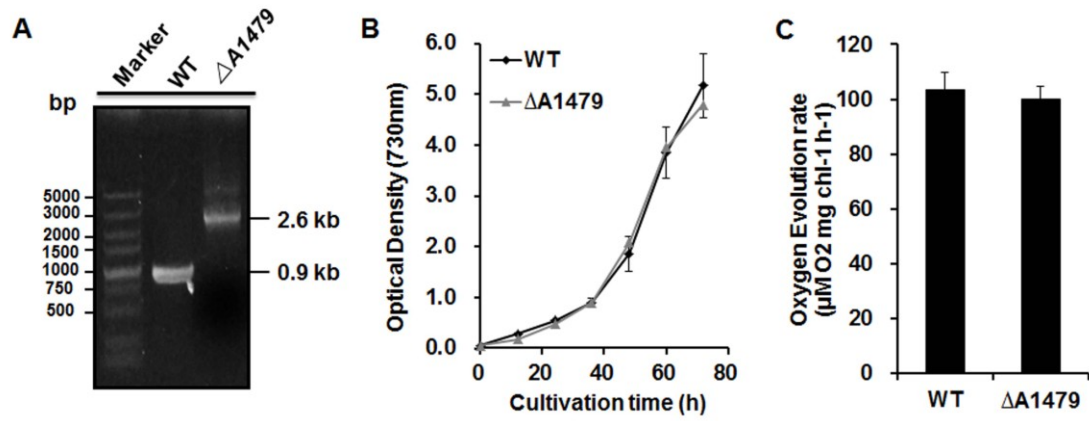

**Figure S4.** Construction of the neutral site platform by inaction of *SYNPCC7002\_A1479* (A) and characterization of the growth rate (B) and oxygen evolution rate (C) between WT and  $\Delta 1479$ .

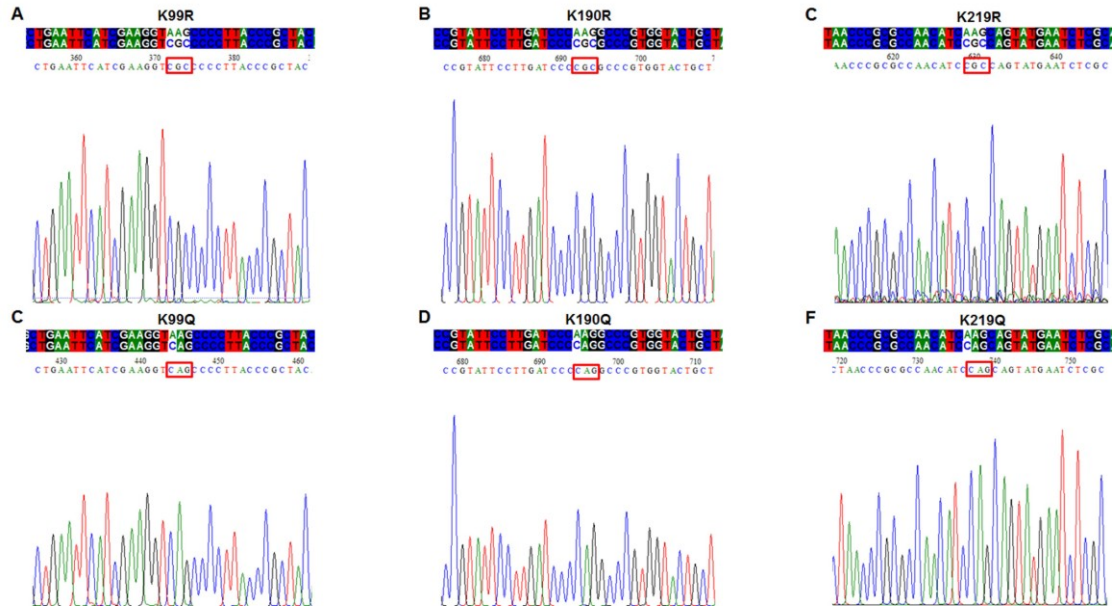

**Figure S5. The mutations of PsbO strains were verified by DNA sequencing.**

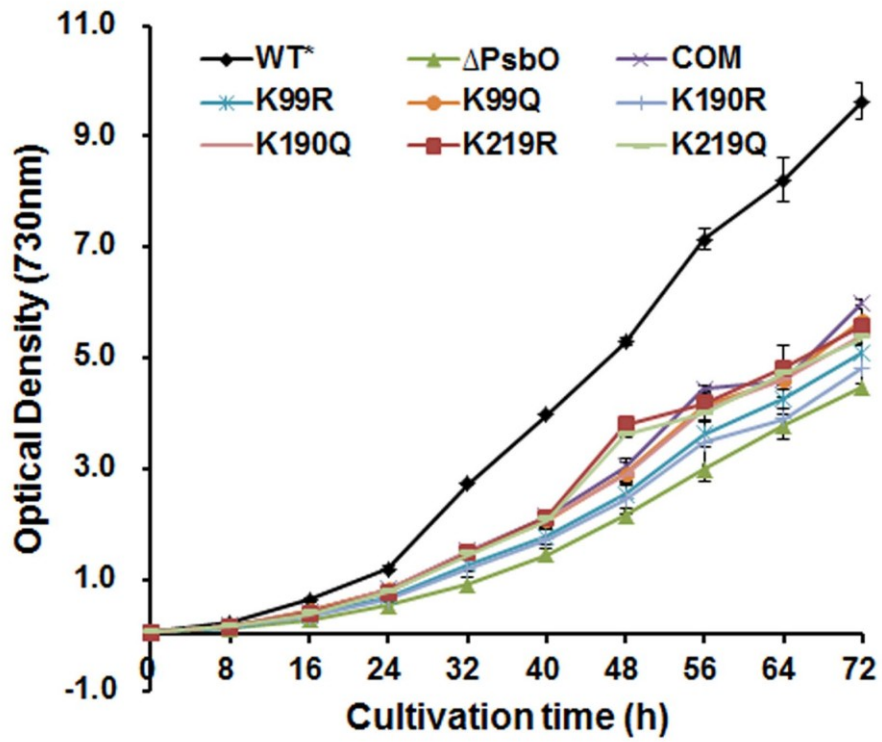

Figure S6. Growth curves of the alternative wild type (WT\*) and mutant *Synechococcus* cells under optimal growth conditions.
